# Supplementary material for: Remodelling of the gut microbiota by hyperactive NLRP3 induces regulatory T cells to maintain homeostasis
Source: PubMed Central journal article supplement (PMC5711854; doi:10.1038/s41467-017-01917-2), 2017-12-01
Supplement: 41467_2017_1917_MOESM1_ESM.pdf [file 41467_2017_1917_MOESM1_ESM.pdf]

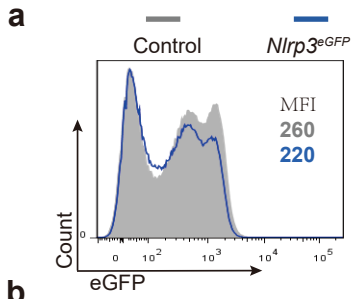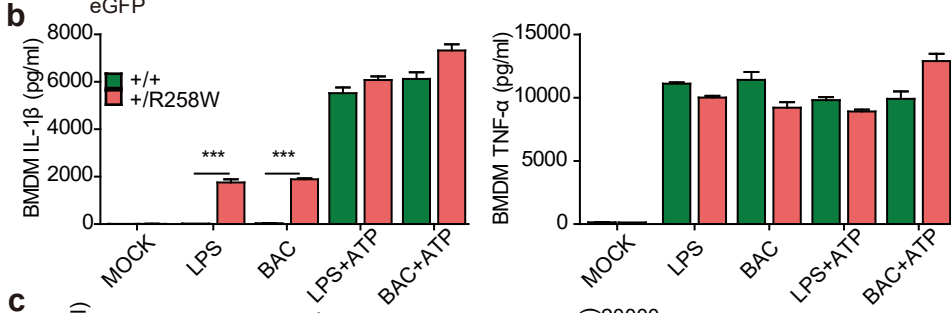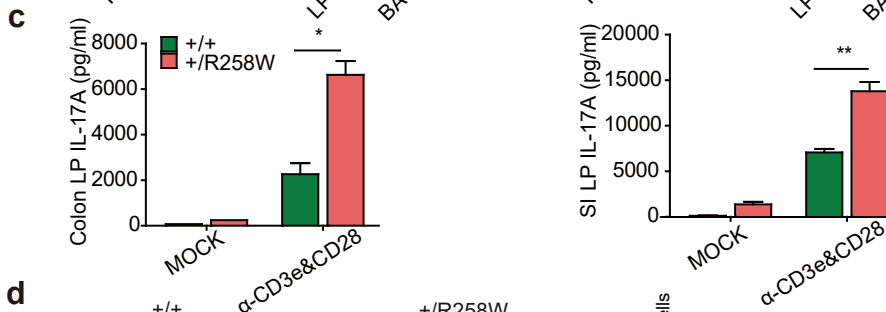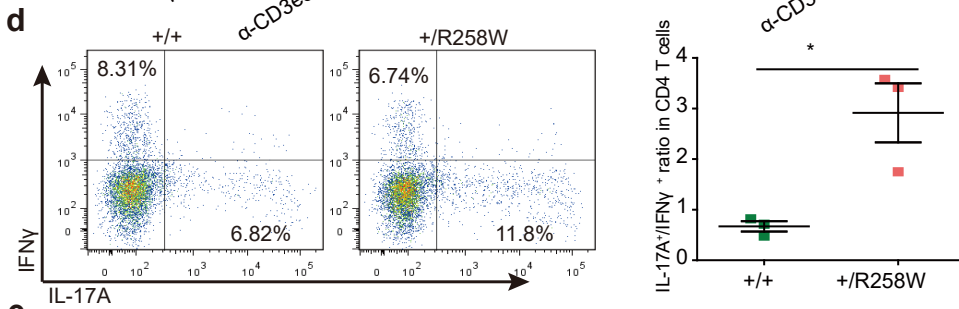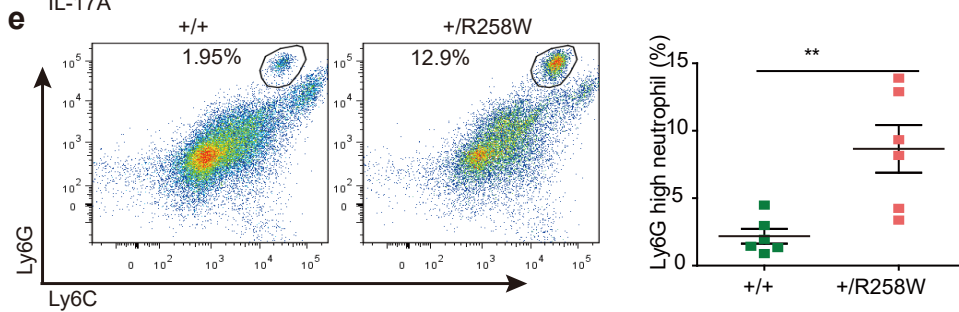

**Supplementary Figure 1. *Nlrp3*<sup>R258W</sup> mice contain a hyperactive inflammasome in the intestine, related to Figure 1.**

(a) The expression of NLRP3 reflected by eGFP signal in colonic epithelial cells isolated from control (grey) and *Nlrp3*<sup>eGFP</sup> reporter mice (blue) were analyzed with flowcytometry. MFI represents geomean fluorescence intensity of eGFP.

(b) WT and *Nlrp3*<sup>R258W</sup> BMDMs were stimulated with heat inactivated faecal bacteria (BAC) at multiplicity of infection (MOI)=20:1 or LPS (100 ng/ml) for 5.5h with or without ATP (5mM) pulse for 30min, IL-1 $\beta$  and TNF- $\alpha$  from cell culture supernatant were determined via ELISA.

(c) Lamina propria (LP) cells isolated from the colon (left panel) or small intestine (right panel) of indicated mice were reactivated with anti-CD3e (1ug/ml) + anti-CD28 (0.25ug/ml) for 48h, IL-17A from culture supernatant was determined via ELISA.

(d-e) Colonic lamina propria cells were isolated from WT and *Nlrp3*<sup>R258W</sup> mice, stimulated with PMA (50ng/ml) plus ionomycin (500ng/ml) in the presence of GolgiStop (0.67ul/ml) for 4h, followed with staining for CD4, IL-17A and IFN- $\gamma$ , then the ratio of IL-17A<sup>+</sup>/IFN- $\gamma$ <sup>+</sup> in CD4<sup>+</sup> T cells were depicted in (d); or directly stained for CD11b, Ly6G and Ly6C, the percentage of Ly6G<sup>high</sup> in CD11b<sup>+</sup> cells were displayed in (e). (b-e) Data are shown as the means  $\pm$  SEM. \*  $P < 0.05$ , \*\*  $P < 0.01$ , \*\*\*  $P < 0.001$  (Two tailed student's t-test).

**a**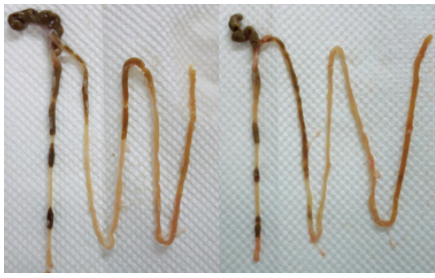

+/+

+/R258W

**b**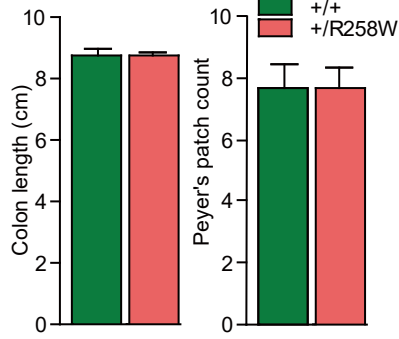**c**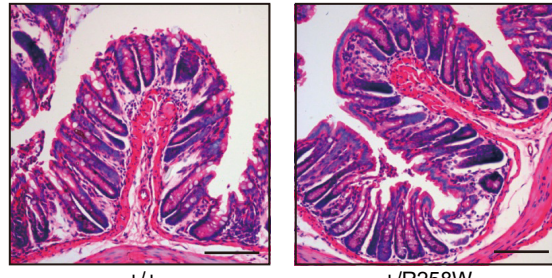

+/+

+/R258W

Colon

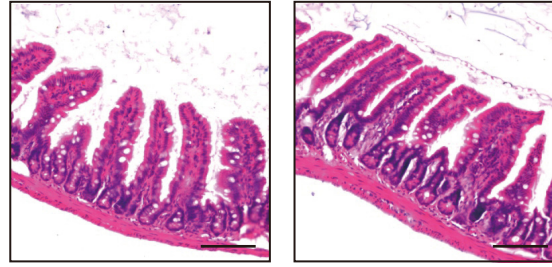

+/+

+/R258W

Small intestine

**d**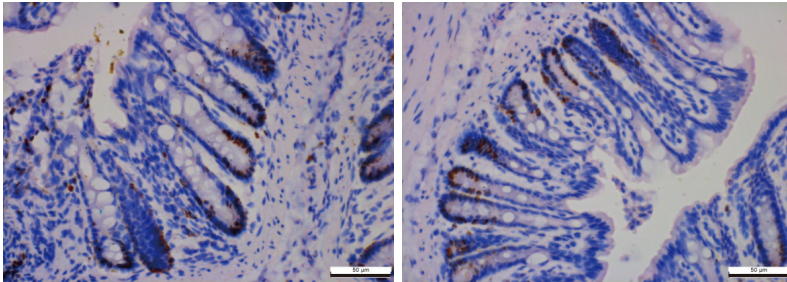

+/+

+/R258W

**e**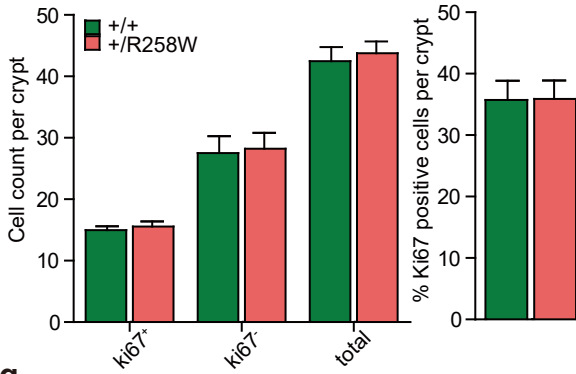**f**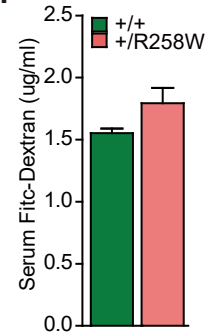**g**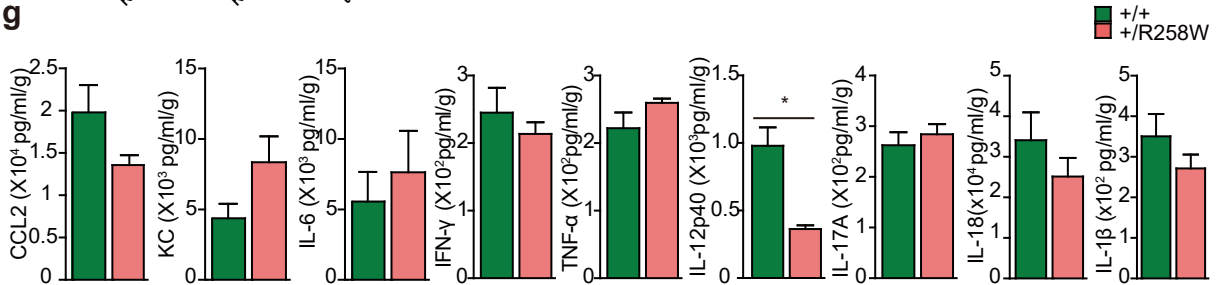

**Supplementary Figure 2. *Nlrp3*<sup>R258W</sup> mice maintain intestinal homeostasis.**

(a) Photographic comparison of intestines from WT (+/+) and *Nlrp3*<sup>R258W</sup> (+/R258W) mice under resting status.

(b) Colon length (left panel) and Peyer's patch counts (right panel) from WT and *Nlrp3*<sup>R258W</sup> mice.

(c) Hematoxylin and eosin (H&E) examination of colon (upper panel) and small intestine (lower panel) mucosa structure from WT and *Nlrp3*<sup>R258W</sup> mice. Scale bar, 100um.

(d-e) Paraffin sections of colon from WT and *Nlrp3*<sup>R258W</sup> mice were stained with antibody against Ki67 (d), scale bar, 50um; and the positive cell numbers and percentage per crypt were assessed quantitatively (e).

(f) Untreated WT (n=4) and *Nlrp3*<sup>R258W</sup> (n=4) mice were gavaged with FITC-Dextran and leakage of FITC-Dextran into the serum was measured 4h later.

(g) Indicated inflammatory mediators were determined via ELISA for colon tissue culture supernatants from untreated WT and *Nlrp3*<sup>R258W</sup> mice. (b, e-g) Data are shown as means ± SEM. \*  $P < 0.05$  (Two tailed student's t-test).

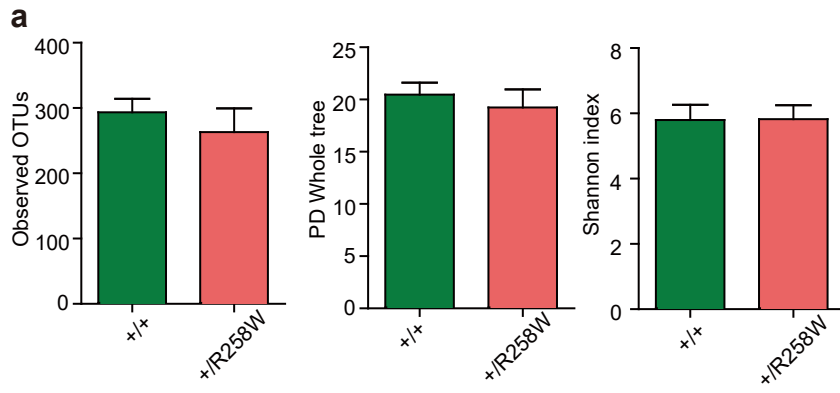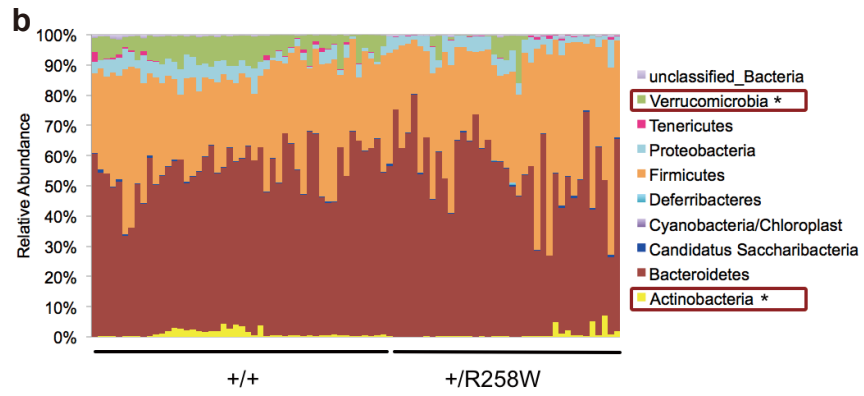

**Supplementary Figure 3. *Nlrp3*<sup>R258W</sup> mice carry a unique gut microbiota, related to Figure 3.**

**(a-b)** WT and *Nlrp3*<sup>R258W</sup> mice fecal bacteria 16S rRNA V3-V4 region was sequenced with Miseq technology (Illumina), the total operative taxonomic units (OTUs), PD whole tree and Shannon index indicating  $\alpha$ -diversity were compared between these mice; data are shown as means  $\pm$  SEM **(a)**. The composition of microbiota from WT and *Nlrp3*<sup>R258W</sup> mice at phylum level was also compared, \* $P$ <0.05, Mann-Whitney test **(b)**.

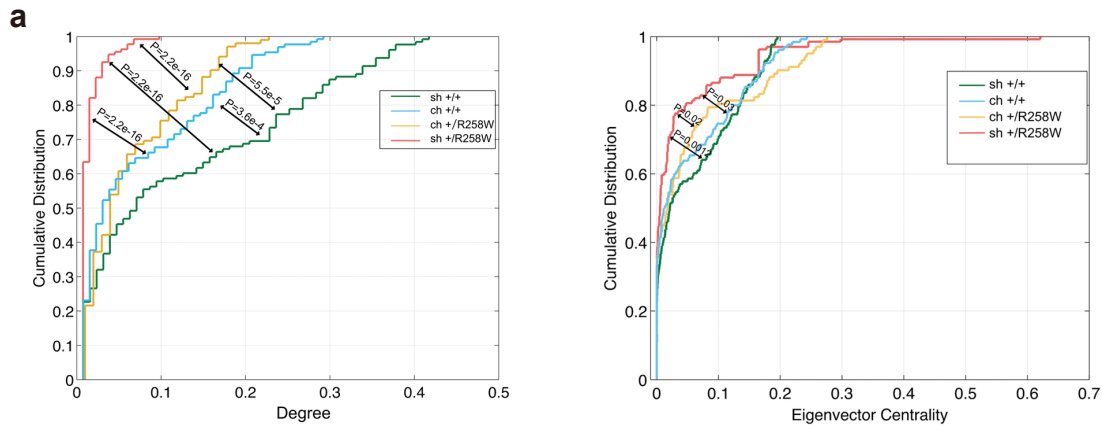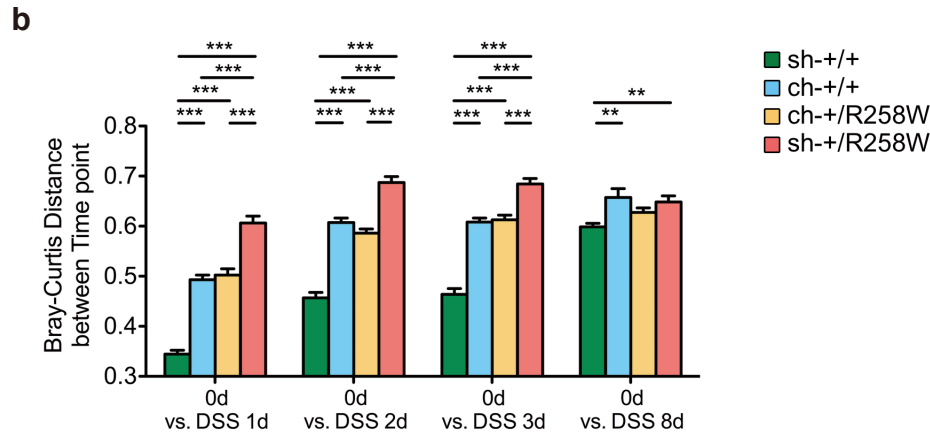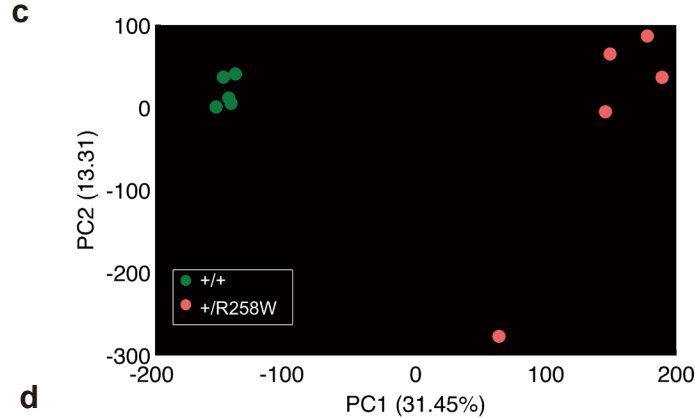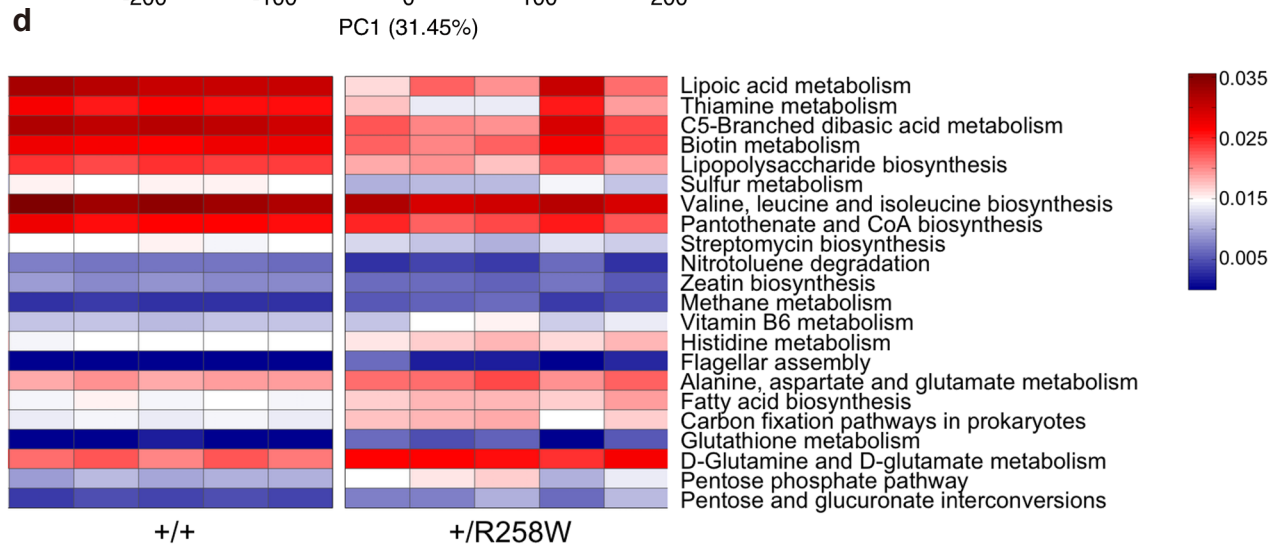

**Supplementary Figure 4. The microbiota from WT and *Nlrp3*<sup>R258W</sup> mice differs in the microbial ecology and functionality, related to Figure 3 and 4.**

(a) The degree and eigenvector centralities were calculated for the network of OTUs from sh-+/+, ch-+/+, ch-/R258W and sh-/R258W mice during DSS treatment (shown in Figures 3f, 4f, respectively). P-Values to test for differences in cumulative distributions were obtained by one-sided Kolmogorov-Smirnov tests.

(b) The Bray-Curtis distance of the gut microbiota before DSS challenge (0d) to the gut microbiota after DSS challenge (1d, 2d, 3d and 8d) was calculated. The data are shown as means  $\pm$  SEM. \*\*  $P < 0.01$ , \*\*\*  $P < 0.001$  (One-way ANOVA with Tukey's post-hoc test).

(c) The PCA score plot of the KEGG orthology (KO) groups recognized with HUMAnN showing a significant shift of the KO profiles between WT and *Nlrp3*<sup>R258W</sup> microbiota (log-transformed).

(d) The heat map shows the abundance of the key pathways in Fig. 3g in each mouse.



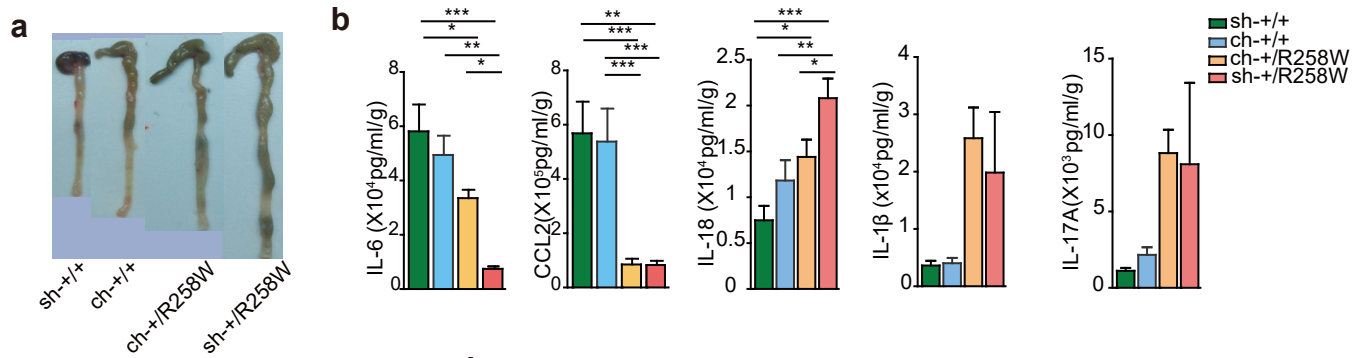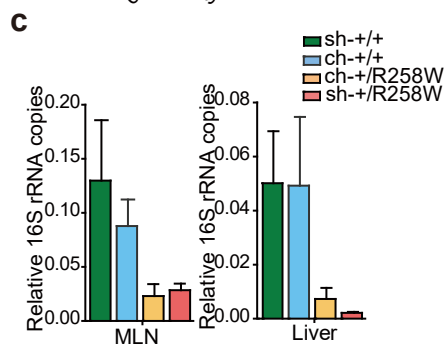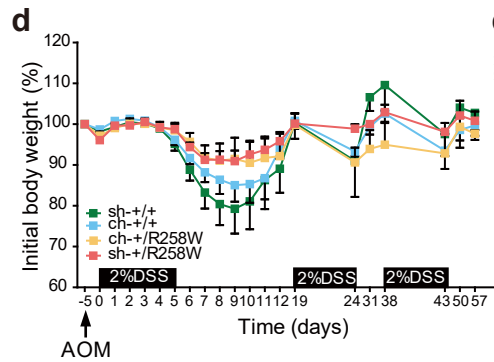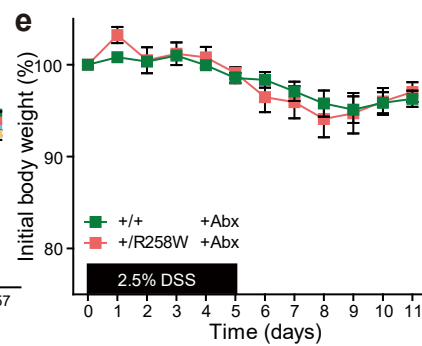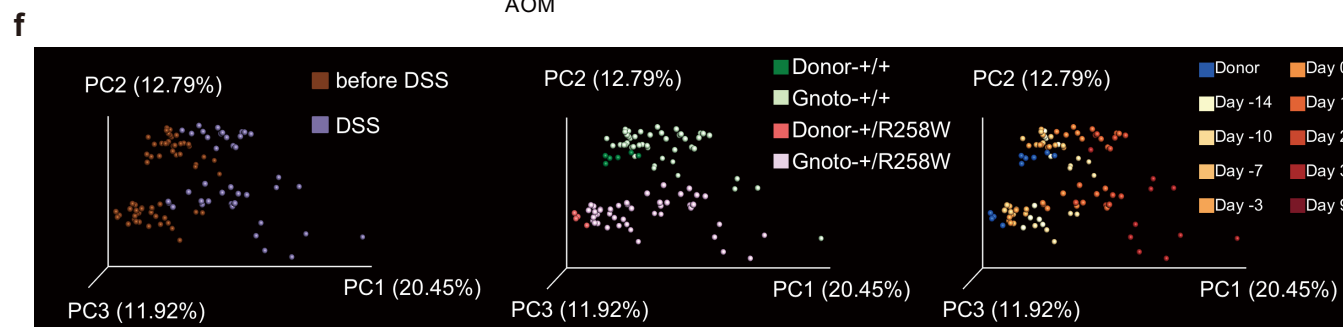

**Supplementary Figure 5. Gut microbiota affects DSS colitis and colorectal cancer development, related to Figure 5.**

(a-b) Colitis was induced in mice as indicated in Figures 5a-5e, the representative colons (a) and inflammatory mediators determined by ELISA in colon tissue culture supernatants (b) were shown. (c) Bacteria dissemination to mesenteric lymphnode (MLN) and liver was determined via Q-PCR with 16S rRNA universal primer pair from indicated mice. (d) Weight curve of mice from colon cancer experiment in Figures 5f-5g were displayed. (e) WT and *Nlrp3*<sup>R258W</sup> mice were treated with antibiotics cocktail (Abx) to remove intestinal bacteria before being subjected to DSS colitis experiment, body weight during DSS colitis induction was assessed. (f) The same mice in Figures 5h-5k, the gut microbiota from donor and recipient mice were plotted in PCoA graph based on Bray-Curtis Distance. Data are shown as mean  $\pm$  SEM (b-e), \* P<0.05, \*\*P<0.01, \*\*\*P<0.001 (One-way ANOVA with Tukey's post-hoc test).

# Supplementary Figure 6.

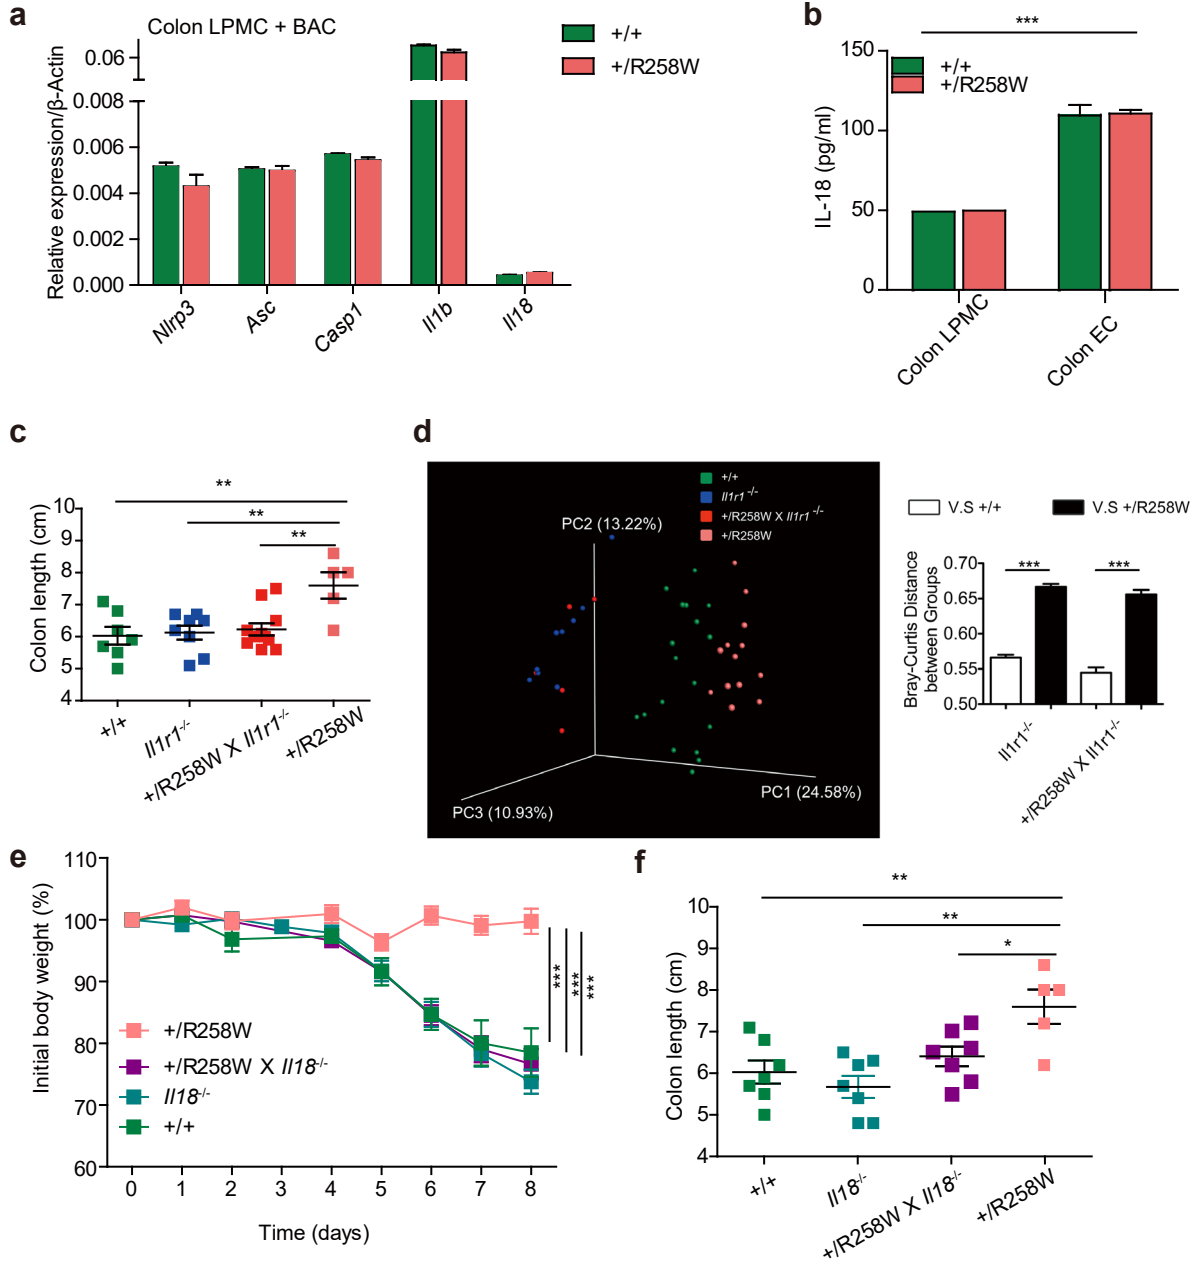

**Supplementary Figure 6. *Nlrp3*<sup>R258W</sup> mutation shapes microbiota via IL-1 $\beta$ , related to Figure 6.**

(a) Colonic LPMCs isolated from WT and *Nlrp3*<sup>R258W</sup> mice were stimulated with heat-inactivated mouse faecal bacteria (BAC) (MOI=20:1) for 12h and assayed for the expression of indicated genes via Q-PCR.

(b) Isolated colon LPMC and EC cells as in Figures 6a-6b from both WT and *Nlrp3*<sup>R258W</sup> mice were cultured without stimulation for 24h, supernatant IL-18 was determined via ELISA. \*\*\* $P < 0.001$  (Two tailed student's t-test).

(c) As in Figure 6e, the colon length was measured on day 8 upon sacrifice of indicated experimental mice. \*\* $P < 0.01$  (One-way ANOVA with Tukey's post-hoc test).

(d) The Bray-Curtis distance of microbiota from *Il1r1*<sup>-/-</sup> and *Nlrp3*<sup>R258W</sup> x *Il1r1*<sup>-/-</sup> mice to that from WT or *Nlrp3*<sup>R258W</sup> mice were calculated. \*\*\* $P < 0.001$  (Two tailed student's t-test).

(e) Changes of body weight in WT (n=8), *Il18*<sup>-/-</sup> (n=10), *Nlrp3*<sup>R258W</sup> x *Il18*<sup>-/-</sup> (n=7) and *Nlrp3*<sup>R258W</sup> (n=5) mice during DSS-induced colitis. \*\*\* $P < 0.001$  (One-way ANOVA with Tukey's post-hoc test).

(f) The colon length of mice in (e) was monitored. \* $P < 0.05$ , \*\* $P < 0.01$  (One-way ANOVA with Tukey's post-hoc test).

# Supplementary Figure 7.

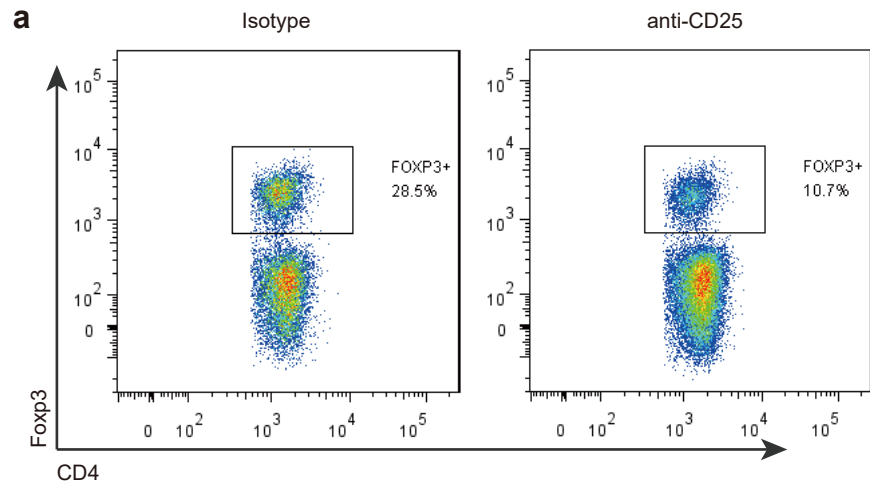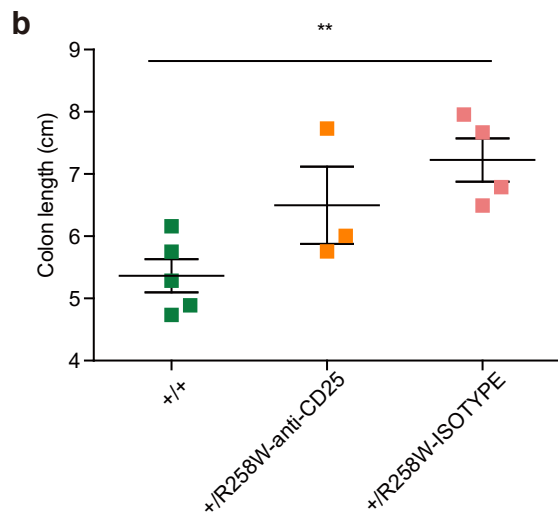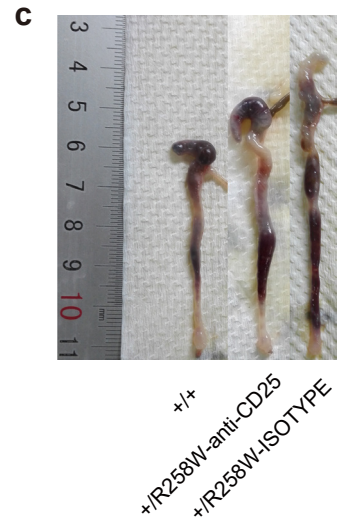

**Supplementary Figure 7. Depletion of Tregs in *Nlrp3*<sup>R258W</sup> mice abolishes protection against DSS colitis, related to Figure 7.**

(a-c) WT (n=5) untreated mice, *Nlrp3*<sup>R258W</sup> (n=4) mice i.p. injected with isotype antibody, and *Nlrp3*<sup>R258W</sup> (n=6) mice i.p. injected with anti-CD25 antibody on day-4 and day-2 with 500ug/mouse/injection were induced for colitis with 4% DSS from day0. The depletion efficiency for Tregs was monitored by FACS, showing representative data (a). The final colon length was summarized in (b) and the representative colons were shown in (c). The data are shown as the means  $\pm$  SEM, \* $P$ <0.05 (One-way ANOVA with Dunnett's post-hoc test).

# Supplementary Figure 8.

Figure 1c

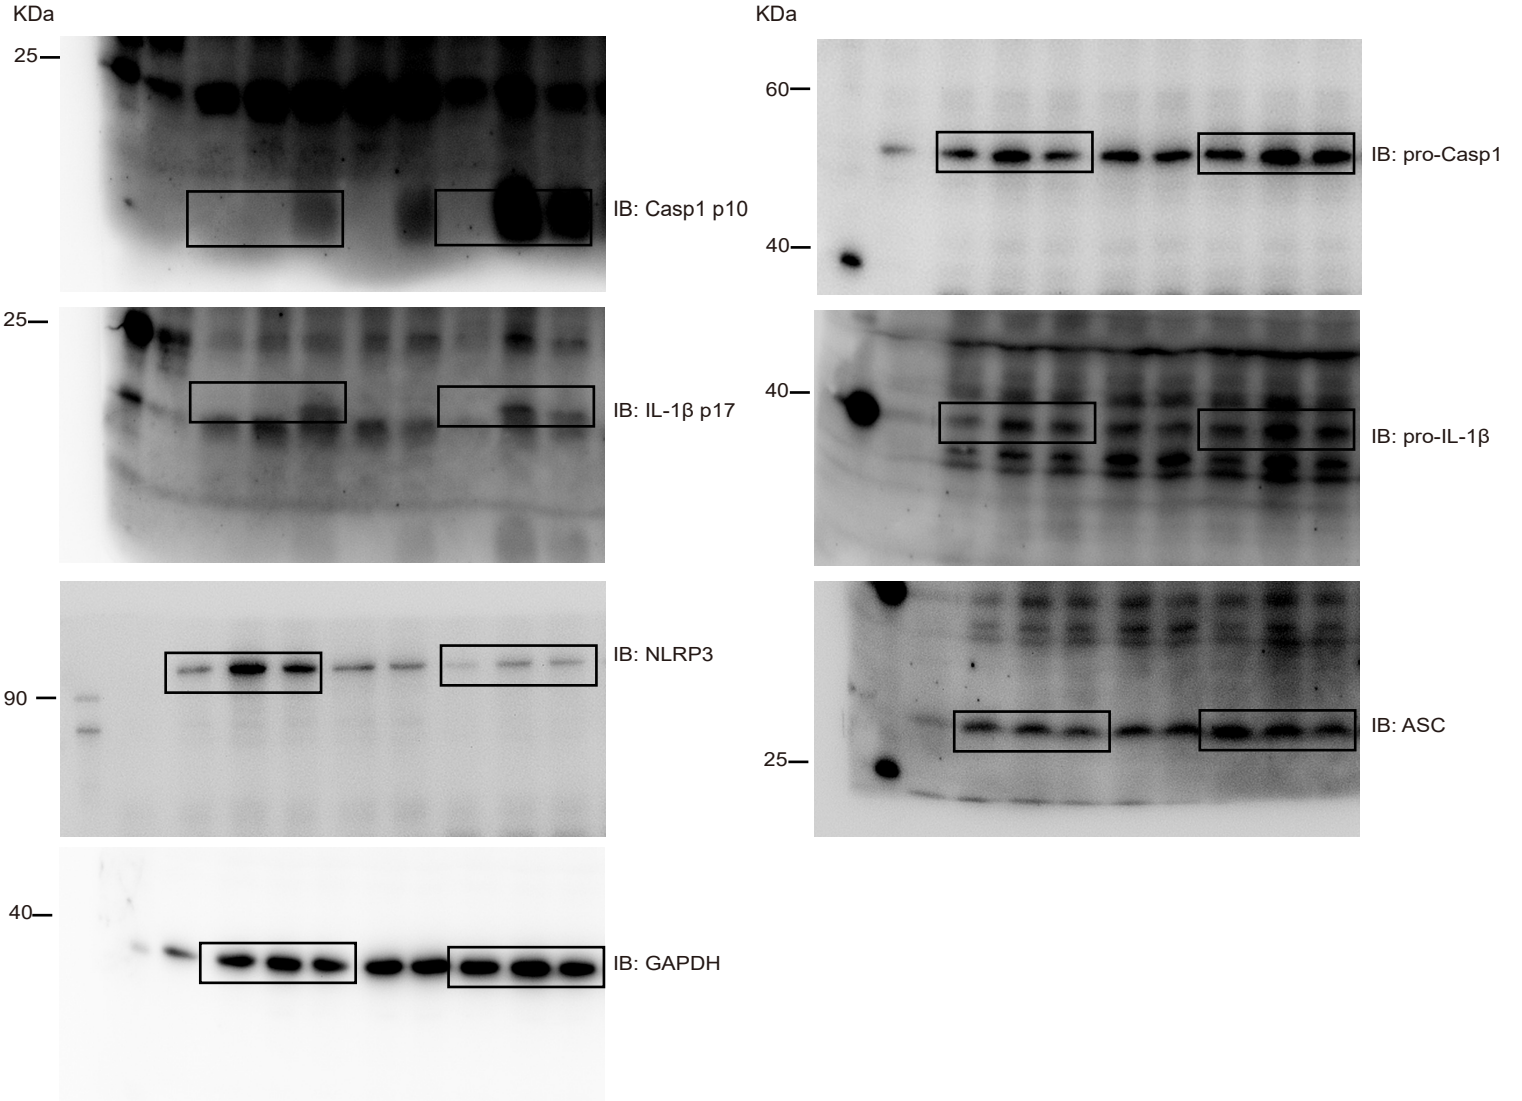

**Supplementary Figure 8. Full gel images for the data shown in Figure 1c.**

Areas in rectangles marked on the gel images are the selected areas showed in Figure 1c, displaying cleaved caspase-1 p10 subunit, pro-caspase-1, IL-1 $\beta$ -p17 fragment, pro-IL-1 $\beta$ , NLRP3, ASC and GAPDH.



Supplementary Table 1. 50 key OTUs that were significantly different between WT and *Nlrp3*<sup>R258W</sup> mice gut microbiota, related to Fig. 3c.

| Serial NO | OTUs   | Phylum          | Class                      | Order              | Family                     | Genus                            |
|-----------|--------|-----------------|----------------------------|--------------------|----------------------------|----------------------------------|
| 1         | OTU78  | Bacteroidetes   | Bacteroidia                | Bacteroidales      | Porphyromonadaceae         | Barnesiella                      |
| 2         | OTU66  | Proteobacteria  | Epsilonproteobacteria      | Campylobacteriales | Helicobacteraceae          | Helicobacter                     |
| 3         | OTU18  | Bacteroidetes   | Bacteroidia                | Bacteroidales      | Porphyromonadaceae         | unclassified Porphyromonadaceae  |
| 4         | OTU29  | Bacteroidetes   | Bacteroidia                | Bacteroidales      | Porphyromonadaceae         | unclassified Porphyromonadaceae  |
| 5         | OTU23  | Bacteroidetes   | Bacteroidia                | Bacteroidales      | Porphyromonadaceae         | unclassified Porphyromonadaceae  |
| 6         | OTU175 | Bacteroidetes   | Bacteroidia                | Bacteroidales      | Porphyromonadaceae         | unclassified Porphyromonadaceae  |
| 7         | OTU52  | Bacteroidetes   | Bacteroidia                | Bacteroidales      | unclassified Bacteroidales |                                  |
| 8         | OTU77  | Bacteroidetes   | Bacteroidia                | Bacteroidales      | Porphyromonadaceae         | unclassified Porphyromonadaceae  |
| 9         | OTU7   | Bacteroidetes   | unclassified Bacteroidetes |                    |                            |                                  |
| 10        | OTU30  | Bacteroidetes   | Bacteroidia                | Bacteroidales      | Bacteroidaceae             | Bacteroides                      |
| 11        | OTU15  | Bacteroidetes   | Bacteroidia                | Bacteroidales      | Porphyromonadaceae         | unclassified Porphyromonadaceae  |
| 12        | OTU136 | Bacteroidetes   | Bacteroidia                | Bacteroidales      | Porphyromonadaceae         | unclassified Porphyromonadaceae  |
| 13        | OTU38  | Bacteroidetes   | Bacteroidia                | Bacteroidales      | Prevotellaceae             | Alloprevotella                   |
| 14        | OTU112 | Bacteroidetes   | Bacteroidia                | Bacteroidales      | Porphyromonadaceae         | unclassified Porphyromonadaceae  |
| 15        | OTU40  | Bacteroidetes   | Bacteroidia                | Bacteroidales      | Porphyromonadaceae         | unclassified Porphyromonadaceae  |
| 16        | OTU41  | Bacteroidetes   | Bacteroidia                | Bacteroidales      | Porphyromonadaceae         | unclassified Porphyromonadaceae  |
| 17        | OTU9   | Firmicutes      | Bacilli                    | Lactobacillales    | Lactobacillaceae           | Lactobacillus                    |
| 18        | OTU164 | Firmicutes      | Clostridia                 | Clostridiales      | Lachnospiraceae            | unclassified Lachnospiraceae     |
| 19        | OTU87  | Firmicutes      | Clostridia                 | Clostridiales      | Ruminococcaceae            | Butyrivibrio                     |
| 20        | OTU537 | Firmicutes      | Clostridia                 | Clostridiales      | Lachnospiraceae            | unclassified Lachnospiraceae     |
| 21        | OTU140 | Firmicutes      | Clostridia                 | Clostridiales      | Lachnospiraceae            | unclassified Lachnospiraceae     |
| 22        | OTU118 | Firmicutes      | Clostridia                 | Clostridiales      | Lachnospiraceae            | unclassified Lachnospiraceae     |
| 23        | OTU304 | Firmicutes      | Clostridia                 | Clostridiales      | Lachnospiraceae            | unclassified Lachnospiraceae     |
| 24        | OTU64  | Firmicutes      | Clostridia                 | Clostridiales      | Lachnospiraceae            | Clostridium XIVa                 |
| 25        | OTU575 | Firmicutes      | Clostridia                 | Clostridiales      | Lachnospiraceae            | Clostridium XIVa                 |
| 26        | OTU163 | Firmicutes      | Clostridia                 | Clostridiales      | Lachnospiraceae            | unclassified Lachnospiraceae     |
| 27        | OTU178 | Firmicutes      | Clostridia                 | Clostridiales      | Lachnospiraceae            | unclassified Lachnospiraceae     |
| 28        | OTU365 | Firmicutes      | Clostridia                 | Clostridiales      | Lachnospiraceae            | unclassified Lachnospiraceae     |
| 29        | OTU668 | Firmicutes      | Clostridia                 | Clostridiales      | Lachnospiraceae            | unclassified Lachnospiraceae     |
| 30        | OTU61  | Bacteroidetes   | Bacteroidia                | Bacteroidales      | Prevotellaceae             | unclassified Prevotellaceae      |
| 31        | OTU21  | Bacteroidetes   | Bacteroidia                | Bacteroidales      | Porphyromonadaceae         | Odoribacter                      |
| 32        | OTU53  | Firmicutes      | Clostridia                 | Clostridiales      | unclassified Clostridiales |                                  |
| 33        | OTU4   | Firmicutes      | Erysipelotrichia           | Erysipelotrichales | Erysipelotrichaceae        | unclassified Erysipelotrichaceae |
| 34        | OTU142 | Firmicutes      | Clostridia                 | Clostridiales      | Lachnospiraceae            | unclassified Lachnospiraceae     |
| 35        | OTU20  | Bacteroidetes   | Bacteroidia                | Bacteroidales      | Prevotellaceae             | Prevotella                       |
| 36        | OTU28  | Bacteroidetes   | Bacteroidia                | Bacteroidales      | Prevotellaceae             | Prevotella                       |
| 37        | OTU16  | Firmicutes      | Clostridia                 | Clostridiales      | Lachnospiraceae            | unclassified Lachnospiraceae     |
| 38        | OTU63  | Firmicutes      | Clostridia                 | Clostridiales      | unclassified Clostridiales |                                  |
| 39        | OTU34  | Actinobacteria  | Actinobacteria             | Coriobacteriales   | Coriobacteriaceae          | Olsenella                        |
| 40        | OTU13  | Bacteroidetes   | Bacteroidia                | Bacteroidales      | Porphyromonadaceae         | unclassified Porphyromonadaceae  |
| 41        | OTU88  | Bacteroidetes   | Bacteroidia                | Bacteroidales      | Porphyromonadaceae         | unclassified Porphyromonadaceae  |
| 42        | OTU105 | Proteobacteria  | Deltaproteobacteria        | Desulfovibrionales | Desulfovibrionaceae        | unclassified Desulfovibrionaceae |
| 43        | OTU1   | Verrucomicrobia | Verrucomicrobiae           | Verrucomicrobiales | Verrucomicrobiaceae        | Akkermansia                      |
| 44        | OTU48  | Firmicutes      | Bacilli                    | Lactobacillales    | Lactobacillaceae           | Lactobacillus                    |
| 45        | OTU45  | Bacteroidetes   | Bacteroidia                | Bacteroidales      | Porphyromonadaceae         | unclassified Porphyromonadaceae  |
| 46        | OTU99  | Bacteroidetes   | Bacteroidia                | Bacteroidales      | Porphyromonadaceae         | unclassified Porphyromonadaceae  |
| 47        | OTU33  | Bacteroidetes   | Bacteroidia                | Bacteroidales      | Porphyromonadaceae         | unclassified Porphyromonadaceae  |
| 48        | OTU2   | Bacteroidetes   | Bacteroidia                | Bacteroidales      | Porphyromonadaceae         | unclassified Porphyromonadaceae  |
| 49        | OTU431 | Bacteroidetes   | Bacteroidia                | Bacteroidales      | Porphyromonadaceae         | Barnesiella                      |
| 50        | OTU6   | Bacteroidetes   | Bacteroidia                | Bacteroidales      | Porphyromonadaceae         | unclassified Porphyromonadaceae  |

Supplementary Table 2. Network parameters, related to Fig. 3f and 4f.

|                                                  | <b>sh-+/+</b> | <b>ch-+/+</b> | <b>ch-+/R258W</b> | <b>sh-+/R258W</b> |
|--------------------------------------------------|---------------|---------------|-------------------|-------------------|
| <b>Number of samples</b>                         | 38            | 40            | 42                | 42                |
| <b>Number of OTUs<sup>a</sup></b>                | 299           | 301           | 288               | 268               |
| <b>Number of nodes (<math> R &gt;0.7</math>)</b> | 128           | 130           | 102               | 134               |
| <b>Isolated nodes (%)<sup>b</sup></b>            | 22.7          | 23.1          | 21.6              | 63.4              |
| <b>Clustering coefficient</b>                    | 0.522         | 0.484         | 0.459             | 0                 |
| <b>Connected components</b>                      | 7             | 12            | 7                 | 11                |
| <b>Network centralization</b>                    | 0.295         | 0.224         | 0.167             | 0.085             |
| <b>Characteristic path length</b>                | 2.995         | 3.146         | 3.544             | 7.151             |
| <b>Average number of neighbors</b>               | 16.172        | 9.6           | 6.471             | 1.925             |
| <b>Network density</b>                           | 0.127         | 0.074         | 0.064             | 0.014             |

<sup>a</sup>OTUs shared by more than 40% samples in each group.

<sup>b</sup>The number of edge for one node =1

Supplementary Table 3. Primer List used in this study.

| <b>primer name</b> | <b>sequence (5'-3')</b>   |
|--------------------|---------------------------|
| mNLRP3 FWD         | TCTATGGTATGCCAGGAGGA      |
| mNLRP3 REV         | GCAGTTCACCACTCTTTCTT      |
| mASC FWD           | CAGAGTACAGCCAGAACAGGACAC  |
| mASC REV           | GTGGTCTCTGCACGAACTGCCTG   |
| mL-18 FWD          | GACTCTTGCCTCAACTTCAAGG    |
| mL-18 REV          | CAGGCTGTCTTTTGTCAACGA     |
| mCASP1 FWD         | ACATTACTGCTATGGACAAGGC    |
| mCASP1 REV         | GCTGATGGAGCTGATTGAAG      |
| mL-1 $\beta$ FWD   | GAAATGCCACCTTTTACAG       |
| mL-1 $\beta$ REV   | CTGGATGCTCTCATCAGGAC      |
| mVillin-1 FWD      | ACGCAGGTTGAGGTGCAGA       |
| mVillin-1 REV      | GGTTGGCACTGTCCACTTC       |
| mCCL5 FWD          | GCTGCTTGCCTACCTCTCC       |
| mCCL5 REV          | TCGAGTGACAAACACGACTGC     |
| mCCL2 FWD          | CCTGCTGCTACTCATTCAACCAG   |
| mCCL2 REV          | AAACTACAGCTTCTTTGGACACC   |
| mKC FWD            | CTGGGATTCACCTCAAGAACATC   |
| mKC REV            | CAGGGTCAAGGCAAGCCTC       |
| mActb FWD          | CCTTCTTGGGTATGGAATCCTGTG  |
| mActb REV          | CAGCACTGTGTTGGCATAGAGG    |
| mtln1 FWD          | TCTCTATTTCCCTGCGCACGAA    |
| mtln1 REV          | GCTGACTGGACCAGCGATCAC     |
| mRetn1b FWD        | AGCTCTCAGTCGTCAAGGCCTAA   |
| mRetn1b REV        | CACAAGCACATCCAGTGACAACCA  |
| mAng4 FWD          | TCTCCAGGAGCACACAGCTA      |
| mAng4 REV          | AAGGACATGGGCTCATTGTC      |
| mPLA2g2a FWD       | CTGTTGCTACAAGAGCCTGG      |
| mPLA2g2a REV       | TTTTCTTGTCCGGCGGAAA       |
| mS100A8 FWD        | TCAAGACATCGTTTGAAAGGAAATC |
| mS100A8 REV        | GGTAGACATCAATGAGGTTGCTC   |
| univ16SrRNA FWD    | GTGGTGATGGTTGTCGTCA       |
| univ16SrRNA REV    | ACGTCGTCCCCACCTTCTC       |
